# Supplementary material
Source: PubMed Central journal article supplement (PMC2934666)
Supplement: supp_M110.116384_jbc.M110.116384-4.pdf [file supp_M110.116384_jbc.M110.116384-4.pdf]

**Supplementary Table 1.** Clinical description of patients

| <b>Parameter</b>     | <b>Number of patients (%)</b> |
|----------------------|-------------------------------|
| <b>Site of tumor</b> |                               |
| Larynx               | 42 (72)                       |
| Pharynx              | 6 (10)                        |
| Other                | 10 (18)                       |
| <b>T-stage</b>       |                               |
| T 0-2                | 19 (33)                       |
| T 3                  | 22 (38)                       |
| T 4                  | 17 (29)                       |
| <b>N-stage</b>       |                               |
| N0-1                 | 35 (60)                       |
| N2-3                 | 23 (40)                       |
| <b>Stage</b>         |                               |
| I-II                 | 9 (16)                        |
| III                  | 17 (29)                       |
| IV                   | 32 (55)                       |
| <b>Grade*</b>        |                               |
| Well Diff.           | 15 (27)                       |
| Moderate Diff.       | 33 (60)                       |
| Poor Diff.           | 7 (13)                        |

\* Pathological data of three patients were missing
