# Supplementary material
Source: PubMed Central journal article supplement (PMC2934666)

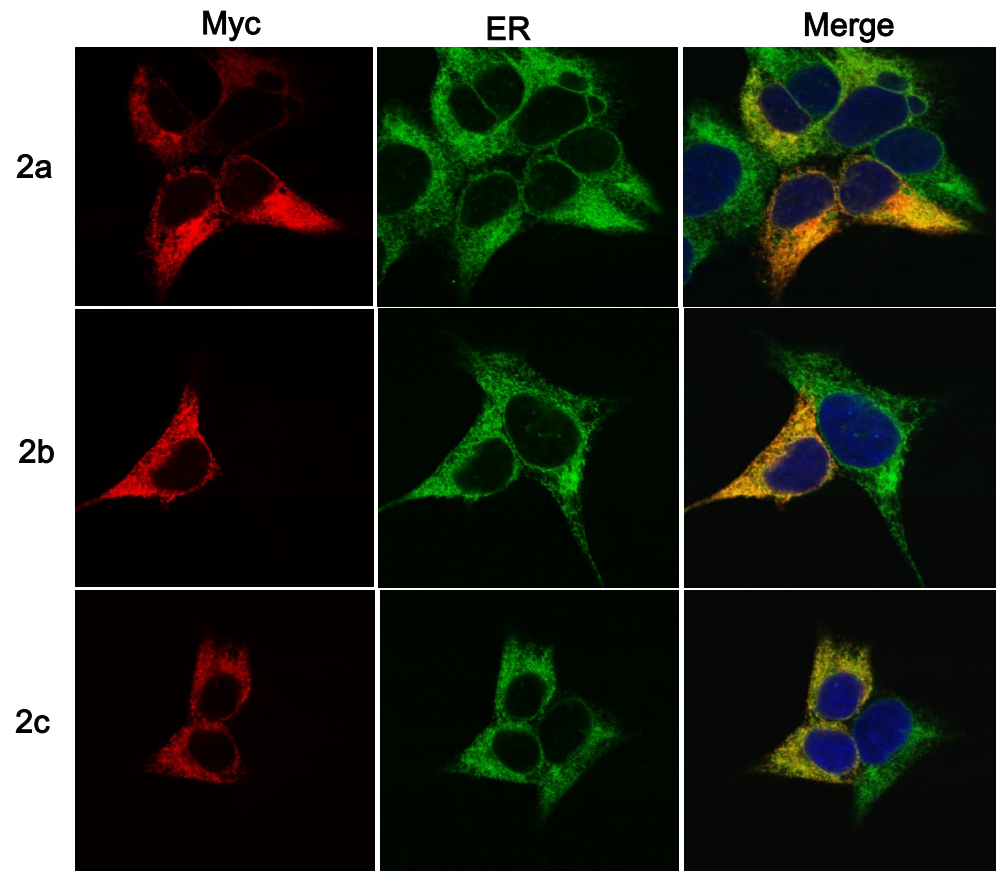

Supplement: supp_M110.116384_jbc.M110.116384-2.pdf [file supp_M110.116384_jbc.M110.116384-2.pdf]

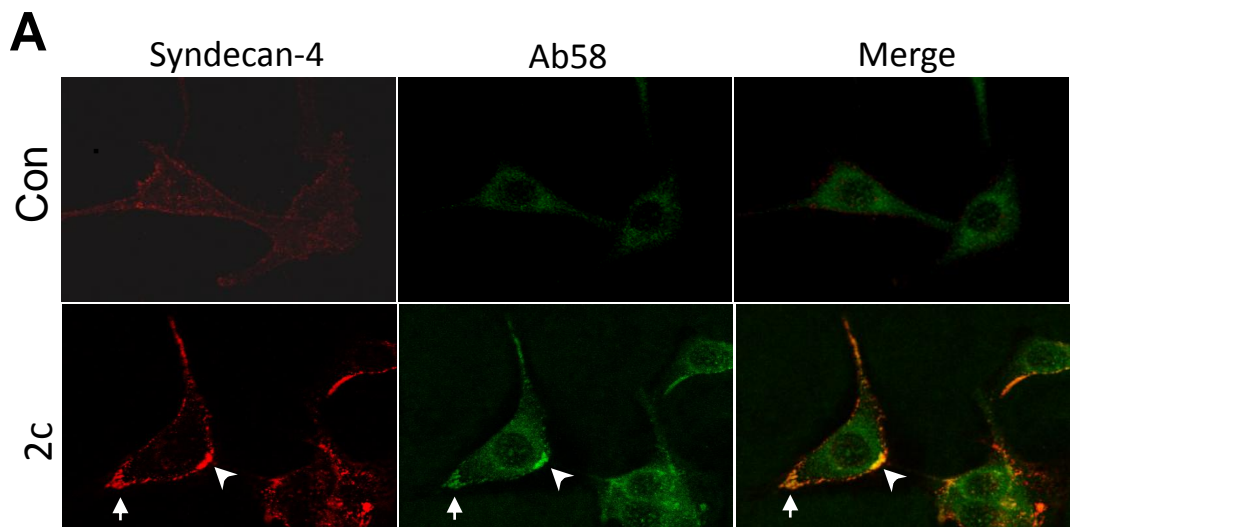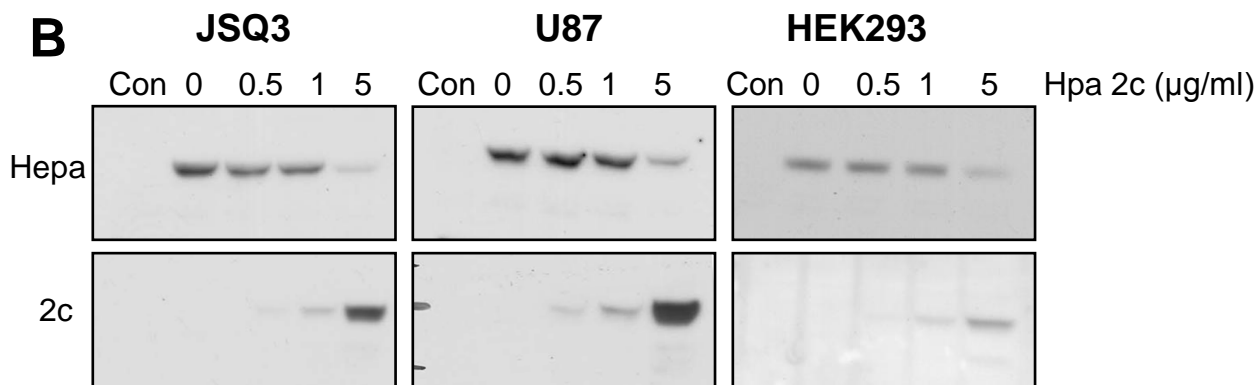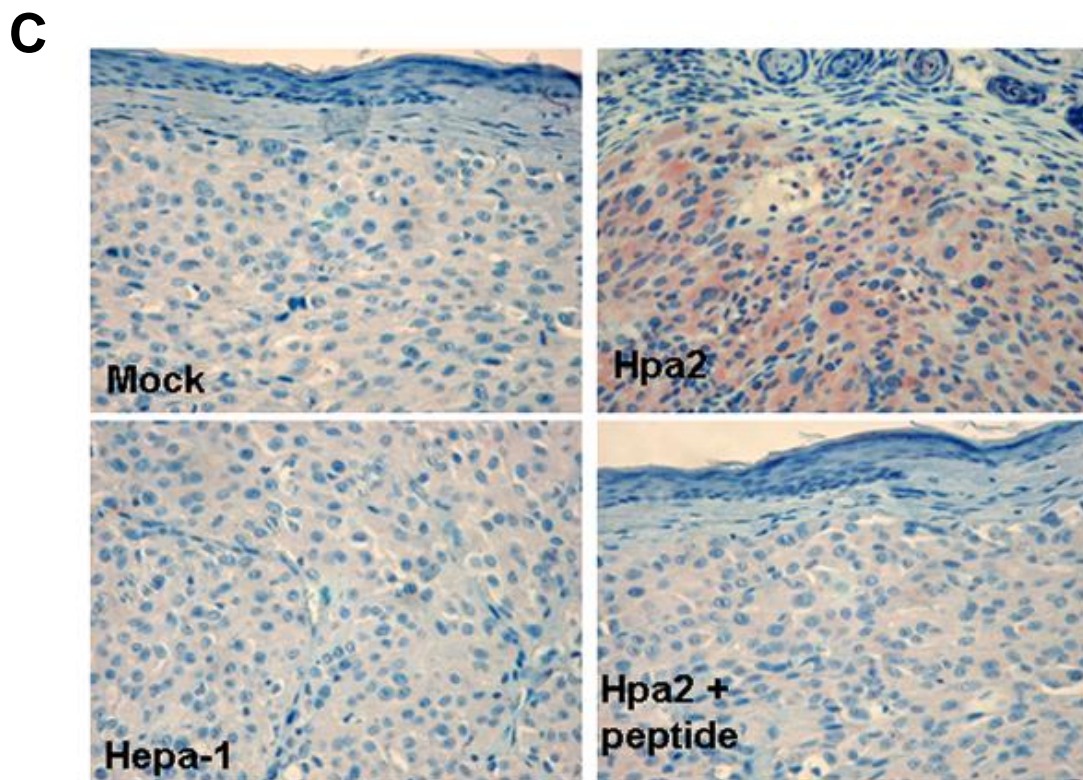

Supplement: supp_M110.116384_jbc.M110.116384-3.pdf [file supp_M110.116384_jbc.M110.116384-3.pdf]
